1 **Title Page**

2 A novel mobile RND-type efflux pump gene cluster, *tmexC3D2-toprJ3*, confers  
3 tigeicycline resistance in *Pseudomonas alcaligenes*

4

5 Shotaro Maehana<sup>1,2,3</sup>, Ryotaro Eda<sup>2</sup>, Nagi Niida<sup>2</sup>, Aki Hirabayashi<sup>4</sup>, Kouji Sakai<sup>5</sup>,  
6 Takashi Furukawa<sup>6</sup>, Kazunari Sei<sup>6</sup>, Hidero Kitasato<sup>1,2,3,\*</sup>, and Masato Suzuki<sup>4,\*</sup>

7

8 <sup>1</sup>Department of Microbiology, School of Allied Health Sciences, Kitasato  
9 University, Kanagawa, Japan

10 <sup>2</sup>Department of Environmental Microbiology, Graduate School of Medical  
11 Sciences, Kitasato University, Kanagawa, Japan

12 <sup>3</sup>Regenerative Medicine and Cell Design Research Facility, School of Allied  
13 Health Sciences, Kitasato University, Kanagawa, Japan

14 <sup>4</sup>Antimicrobial Resistance Research Center, National Institute of Infectious  
15 Diseases, Tokyo, Japan

16 <sup>5</sup>Department of Veterinary Science, National Institute of Infectious Diseases,  
17 Tokyo, Japan

18 <sup>6</sup>Department of Environmental Hygiene, School of Allied Health Sciences,  
19 Kitasato University, Kanagawa, Japan

20

21 \*Corresponding authors.

22 E-mail address: hkita@kitasato-u.ac.jp (H. Kitasato); suzuki-m@nih.go.jp (M.  
23 Suzuki)

24

25 Running Title: A novel *tmexC3D2-toprJ3* gene cluster in *P. alcaligenes*

26 Keywords: RND efflux pump, TMexCD-TOprJ, metallo- $\beta$ -lactamase, IMP, class I

27 integron, super-integron, *Pseudomonas alcaligenes*

28

29 **Abstract**

30 Tigecycline exhibits promising activity against multidrug-resistant  
31 gram-negative bacteria (MDR-GNB). However, mobile tigecycline resistance  
32 genes, such as *tmexCD-toprJ* encoding RND efflux pumps, have emerged. Here,  
33 we identified a novel *tmexC3D2-toprJ3* gene cluster in tigecycline- and  
34 carbapenem-nonsusceptible *Pseudomonas alcaligenes* isolates from hospital  
35 sewage in Japan in 2020. *tmexC3D2-toprJ3* and two copies of *bla<sub>IMP-1</sub>* were  
36 located on the chromosome. This suggests that diverse *tmexCD-toprJ*-like  
37 genes have spread among MDR-GNB worldwide and further epidemiological  
38 genomic studies are needed.

39

## 40 Main Text

41 Tigecycline is considered a last-resort antimicrobial against infections caused  
42 by multidrug-resistant gram-negative bacteria (MDR-GNB). Recently, mobile  
43 tigecycline resistance genes, *tet(X3)*, *tet(X4)*, and other variants, *tet(X5)* to  
44 *tet(X15)*, encoding flavin-dependent monooxygenases that catalyze tigecycline  
45 degradation have emerged (1-4). Furthermore, mobile tigecycline resistance  
46 gene clusters, *tmexCD1-toprJ1*, *tmexCD2-toprJ2*, and *tmexCD3-toprJ3*,  
47 encoding the resistance–nodulation–cell division (RND) efflux pumps that  
48 excrete multiple antimicrobials, including tetracyclines such as tigecycline,  
49 cephalosporins, fluoroquinolones, and aminoglycosides, have emerged (5-8).

50 Here, we report *Pseudomonas alcaligenes* isolates harboring a novel variant  
51 of *tmexCD-toprJ* along with two copies of a metallo- $\beta$ -lactamase (MBL) gene,  
52 *bla<sub>IMP-1</sub>*. *P. alcaligenes* is a gram-negative aerobic rod belonging to the bacterial  
53 family Pseudomonadaceae, of which members are common inhabitants of soil  
54 and water and are rare opportunistic human pathogens (9). *P. alcaligenes* has  
55 also been suggested to be a causative agent of secondary bacterial infection  
56 during COVID-19 pneumonia (10). However, little is known about the clinical  
57 importance of *P. alcaligenes*, mainly because of the difficulties in identifying and  
58 distinguishing this bacterium from closely related *Pseudomonas* species such as  
59 *P. aeruginosa*, *P. mendocina*, and *P. pseudoalcaligenes*, in medical settings.

60 Eight ceftriaxone-resistant isolates of *P. alcaligenes* were obtained from  
61 sewage water from a medical institution in Japan in 2020. Whole-genome  
62 sequence analysis of *P. alcaligenes* isolates using HiSeq X (Illumina) and the  
63 core genome phylogeny based on their draft genome sequences showed that

64 these isolates were phylogenetically very similar (Fig. S1). Moreover, all *P.*  
65 *alcaligenes* isolates harbored the same set of antimicrobial resistance (AMR)  
66 genes, including *tmexCD-toprJ*-like genes, *bla*<sub>IMP-1</sub> (MBL gene conferring  
67 carbapenem resistance), *aac(6′)-Ib-cr* (aminoglycoside resistance gene), *fosE*  
68 (fosfomicin resistance gene), *qacG2* (multidrug resistance gene), and *sul1*  
69 (sulfonamide resistance gene), suggesting that these isolates were clonally  
70 disseminated (Fig. S1).

71 One of the *P. alcaligenes* isolates, KAM426, was further sequenced using  
72 MinION [Oxford Nanopore Technologies (ONT)], and hybrid sequence analysis  
73 using both Illumina and ONT reads resulted in the circular complete  
74 chromosome sequence (4.68 Mb, accession no. [AP024354](#)). Average  
75 nucleotide identity (ANI) analysis revealed that KAM426 is 96.5% identical to *P.*  
76 *alcaligenes* strain NCTC 10367<sup>T</sup> (type strain, accession no. [UGUP00000000](#)),  
77 and the isolate harbored *tmexCD-toprJ*-like genes along with two copies of  
78 *bla*<sub>IMP-1</sub> on its chromosome (Fig. S2). Antimicrobial susceptibility testing showed  
79 that *P. alcaligenes* KAM426 was nonsusceptible to tigecycline and  
80 broad-spectrum β-lactams, including carbapenems. According to the broth  
81 dilution method based on CLSI 2020, the minimum inhibitory concentration  
82 (MIC) of tigecycline against KAM426 was 2 mg/L and was decreased to 1 mg/L  
83 in the presence of the efflux pump inhibitor 1-(1-naphthylmethyl)-piperazine (75  
84 mg/L). According to the Etest (bioMérieux) based on to the manufacturer  
85 instructions, the MICs of imipenem and meropenem against KAM426 were 8  
86 and >32 mg/L, respectively, and these were decreased to <1 and 0.19 mg/L,  
87 respectively, in the presence of the MBL inhibitor EDTA. These results

88 suggested that *tmexCD-toprJ*-like genes and *bla*<sub>IMP-1</sub> are responsible for  
89 tigeicycline and carbapenem resistance in this isolate.

90 The coding sequences of *tmexCD-toprJ*-like genes in *P. alcaligenes* KAM426  
91 (KAM426\_19240, KAM426\_19250, and KAM426\_19260 in accession no.  
92 [AP024354](#)) were highly identical to those of *tmexCD1-toprJ1* in *Klebsiella*  
93 *pneumoniae* strain AH58I (accession no. [MK347425](#)) isolated from livestock in  
94 China in 2017 (5), those of *tmexCD2-toprJ2* in *Raoultella ornithinolytica* strain  
95 NC189 (accession no. [MN175502](#)) isolated from a human in China in 2018 (7),  
96 and those of *tmexCD3-toprJ3* in *Proteus mirabilis* strain RGF134-1 (accession  
97 no. [CP066833](#)) isolated from a pig in China in 2019 (8), respectively. The  
98 identities of the *tmexC*-like gene in KAM426 (KAM426\_10690) compared with  
99 *tmexC1*, *tmexC2*, and *tmexC3* were 94.0% (1094/1164 nt), 94.6% (1101/1164 nt),  
100 and 98.6% (1148/1164 nt, the gene product was 98.7% identical to TMexC3 with  
101 five amino acid substitutions), respectively. For the *tmexD*-like gene in KAM426  
102 (KAM426\_10700), these identities were 96.5% (3025/3136 nt), 99.1%  
103 (3108/3135 nt, the gene product was perfect match to TMexD2), and 97.1%  
104 (3046/3136 nt), respectively. For the *toprJ*-like gene in KAM426  
105 (KAM426\_10710), the identities were 99.9% (1433/1434 nt), 99.9% (1417/1419  
106 nt), and 100% (1434/1434 nt, the gene product was perfect match to TOprJ3),  
107 respectively. Thus, we designated *tmexCD-toprJ*-like genes in KAM426 as  
108 *tmexC3D2-toprJ3*.

109 The *nfxB*-like gene, which has been suggested to be involved in the  
110 expression of the *tmexCD-toprJ*-like gene (5), was found upstream  
111 *tmexC3D2-toprJ3* in *P. alcaligenes* KAM426 (KAM426\_19230 in accession no.

112 [AP024354](#)), and *tmexC3D2-toprJ3* was flanked by the IS5/IS1182 family  
113 transposase gene (Fig. 1A upper). Furthermore, the genomic region containing  
114 *nfxB* and *tmexC3D2-toprJ3* in KAM426 was surrounded by many putative mobile  
115 gene elements (MGEs), and this genomic region was not present in *P.*  
116 *alcaligenes* strain NEB 585 (accession no. [CP014784](#)) (Fig. 1A). NEB 585 was  
117 isolated from a water environment in the United States in 1989 and is the only  
118 other *P. alcaligenes* strain for which the complete chromosome sequence has  
119 been reported (11) other than KAM426. The genomic recombination regions in  
120 KAM426 and NEB 585 encoded a set of common genes (KAM426\_19430 to  
121 KAM426\_19470 in accession no. [AP024354](#), and A0T30\_13575 to  
122 A0T30\_13555 in accession no. [CP014784](#)) (Fig. 1A), although their functions  
123 are unknown. The results suggest that KAM426 acquired *tmexCD-toprJ*-like  
124 genes, which confer resistance to multiple antimicrobials including tigecycline,  
125 via horizontal gene transfer (HGT) mediated by MGEs.

126 BLASTn analysis using megablast revealed that two *Pseudomonas* spp.  
127 strains in the NCBI database of Nucleotide collection (nr/nt) have the exact same  
128 sequence containing the *tmexC3D2-toprJ3* gene cluster along with *nfxB*. A  
129 *bla*<sub>DIM-2</sub>-harboring *Pseudomonas* sp. strain, BJP69, isolated from a human in  
130 China in 2015 (12) carries *tmexC3D2-toprJ3* on its chromosome (accession no.  
131 [CP041933](#)) and a *bla*<sub>KPC-2</sub>-harboring *P. aeruginosa* strain, NDTH9845, isolated  
132 from a human in China in 2018 carries *tmexC3D2-toprJ3* on plasmid  
133 pNDTH9845 (accession no. [CP073081](#)) (Fig. 1B). ANI analysis confirmed that  
134 BJP69 is 98.0% identical to *Pseudomonas juntendi* strain BML3<sup>T</sup> (type strain,  
135 accession no. [BLJG01000000](#)) and that NDTH9845 is 99.2% identical to *P.*

136 *aeruginosa* DSM 50071<sup>T</sup> (type strain, accession no. [FUXR01000000](#)).  
137 *tmexC3D2-toprJ3* was determined to be flanked by the IS5/IS1182 family  
138 transposase gene in *P. aeruginosa* pNDTH9845, whereas no MGE was found  
139 upstream or downstream of *tmexC3D2-toprJ3* in *P. juntendi* BJP69 (Fig. 1B).  
140 Together with *P. alcaligenes* KAM426 in this study, these three *Pseudomonas*  
141 spp. strains harbor acquired carbapenemase genes, in addition to  
142 *tmexC3D2-toprJ3*, showing that they have accumulated clinically relevant AMR  
143 genes.

144 The integron-integrase IntI1 catalyzes site-specific recombination between the  
145 *attI1* and *attC* sites (13). The class 1 integron gene cassette consisting of *intI1*  
146 with the *attI1* site, *qacEΔ1* (disrupted form of *qacE*), and *sul1* in *P. alcaligenes*  
147 KAM426 (accession no. [AP024354](#)) contain several AMR genes, including *fosE*,  
148 two copies of *aac(6')-Ib-cr*, *bla<sub>IMP-1</sub>*, and *qacG2* with their *attC* sites (Fig. 2A). The  
149 *bla<sub>IMP-1</sub>*-containing integron gene cassette in KAM426 was found to be  
150 surrounded by many putative transposase genes, and this MGE-containing  
151 genomic region was not present in *P. alcaligenes* NEB 585 (accession no.  
152 [CP014784](#)) (Fig. 2A). The genomic region around ATP-dependent helicase  
153 genes (KAM426\_37950 and KAM426\_36180 in accession no. [AP024354](#), and  
154 A0T30\_05350 in accession no. [CP014784](#)) could be a hot spot for HGT (Fig. 2A),  
155 but there have been no reports to suggest this possibility to date.

156 The other copy of *bla<sub>IMP-1</sub>* was contained within a partial structure of the  
157 integron gene cassette consisting of two copies of *aac(6')-Ib-cr* followed by  
158 *bla<sub>IMP-1</sub>*, as described previously herein (Fig. 2A), in a different location in the  
159 chromosome of *P. alcaligenes* KAM426 (Fig. 2B). Interestingly, a comparison



160 between the *bla*<sub>IMP-1</sub>-containing genomic region of *P. alcaligenes* KAM426 and  
161 the corresponding genomic region in *P. alcaligenes* NEB 585 revealed the  
162 presence of multiple copies of short repeated sequences (approximately 80 bp),  
163 which were identical to PARs (*Pseudomonas alcaligenes* repetitive DNAs) within  
164 the super-integron In55044 in *P. alcaligenes* strain ATCC 55044 (accession no.  
165 [AY038186](#)) (14) (Fig. 2B).

166 The super-integron, which was first identified in *Vibrio cholerae*, is  
167 distinguished from conventional integrons in several respects, such as size and  
168 the nature of the genes contained within cassettes and contributes to the  
169 acquisition of AMR genes (15-17). The PARs were reported as recombination  
170 sites for the integrase gene (*intI*<sub>Pac</sub> in accession no. [AY038186](#)) in the  
171 super-integron in *P. alcaligenes* (14). The PARs in *P. alcaligenes* KAM426 and *P.*  
172 *alcaligenes* NEB 585 contained conserved sequences of inverted repeats (1L,  
173 2L, 2R, and 1R) with a PAR signature and variable regions between inverted  
174 repeats 2L and 2R, as shown in *P. alcaligenes* ATCC 55044 (14) (Fig. S3).  
175 Although KAM426 and NEB 585 lacked the integrase gene flanking the PAR and  
176 most of the contained genes had no known function, these plastic genomic  
177 regions in both strains retained their evolutionary histories of gene acquisitions  
178 mediated by the super-integron. There was no PAR around *bla*<sub>IMP-1</sub> in KAM426,  
179 suggesting that the super-integron is not directly involved in the acquisition of  
180 *bla*<sub>IMP-1</sub>, and this genomic region is likely one of the hot spots for HGT. KAM426  
181 is thought to have incorporated *bla*<sub>IMP-1</sub> into the class 1 integron gene cassette  
182 first (Fig. 2A) and then incorporated the partial structure containing *bla*<sub>IMP-1</sub> into  
183 the other genomic region flanked by the super-integron (Fig. 2B), leading to a

184 high level of resistance by increasing the copy number of AMR genes.

185 Our study provides a glimpse into environmental bacteria that have been  
186 rapidly and silently becoming resistant to clinically relevant antimicrobials,  
187 including tigecycline and carbapenem, and highlights the importance of AMR  
188 monitoring using wastewater to detect a future clinical crisis before it happens.  
189 Furthermore, *P. alcaligenes* would be considered an important environmental  
190 reservoir that supplies AMR genes to other related *Pseudomonas* species that  
191 are more virulent and likely to cause nosocomial infections, such as *P.*  
192 *aeruginosa*.

193

194 **Nucleotide Sequences**

195 The complete genome sequence of *P. alcaligenes* KAM426 has been  
196 deposited at GenBank/EMBL/DDBJ under the accession number [AP024354](#).  
197 Draft genome sequences of *P. alcaligenes* KAM428, KAM429, KAM430,  
198 KAM432, KAM434, KAM435, and KAM436 have been deposited at  
199 GenBank/EMBL/DDBJ under the accession numbers [BPMN000000000](#),  
200 [BPMO000000000](#), [BPMP000000000](#), [BPMQ000000000](#), [BPMR000000000](#),  
201 [BPMS000000000](#), and [BPMT000000000](#), respectively.

202

203 **Funding**

204 This work was supported by grants (JP21fk0108093, JP21fk0108139,  
205 JP21fk0108133, JP21wm0325003, JP21wm0325022, JP21wm0225004, and  
206 JP21wm0225008 to M. Suzuki) from the Japan Agency for Medical Research  
207 and Development (AMED), and grants (20K07509 to M. Suzuki; 21K15440 for A.  
208 Hirabayashi) from the Ministry of Education, Culture, Sports, Science and  
209 Technology (MEXT), Japan.

210

211 **Transparency declarations**

212 None to declare.

213

214 **Legends**

215 Fig. 1. The *tmexC3D2-toprJ3* gene cluster in *Pseudomonas alcaligenes*  
216 KAM426. (A) Genetic context of the *tmexC3D2-toprJ3* gene cluster in *P.*  
217 *alcaligenes* KAM426 and its surrounding genomic region (the region between  
218 1,977,208 and 2,027,209 nt in accession no. [AP024354](#)), and structural  
219 comparison with the corresponding genomic region in *P. alcaligenes* NEB 585  
220 (the region between 2,990,265 and 2,915,762 nt in accession no. [CP014784](#)).  
221 (B) Structural comparison of the *tmexC3D2-toprJ3* gene cluster in *P. alcaligenes*  
222 KAM426 (the region between 1,995,475 and 2,006,928 nt in accession no.  
223 [AP024354](#)) with that in the chromosome of *P. juntendi* BJP69 (the region  
224 between 3,340,041 and 3,349,533 nt in accession no. [CP041933](#)) and in  
225 plasmid pNDTH9845 of *P. aeruginosa* NDTH9845 (the region between 225,014  
226 and 215,640 nt in accession no. [CP073081](#)). The strain names of *Pseudomonas*  
227 spp., along with the country and year in which bacteria were isolated, are shown.  
228 *tmexC3D2-toprJ3* genes (TRG), other AMR genes (ARG), mobile gene elements  
229 (MGE), and other genes (Other) are highlighted in red, yellow, light blue, and  
230 gray, respectively. Sequence identity is shown as a color scale with the indicated  
231 percentages. Linear comparisons of sequences were performed using BLASTn  
232 and visualized with Easyfig (<http://mjsull.github.io/Easyfig/>).

233

234 Fig. 2. Two copies of *bla*<sub>IMP-1</sub> genes in *Pseudomonas alcaligenes* KAM426. (A)  
235 Genetic context of the class I integron gene cassette containing *bla*<sub>IMP-1</sub> in *P.*  
236 *alcaligenes* KAM426 and its surrounding genomic region (the region between  
237 3,757,827 and 4,033,855 nt in accession no. [AP024354](#)), and structural

238 comparison with the corresponding genomic region in *P. alcaligenes* NEB 585  
239 (the region between 1,159,724 and 1,200,667 nt in accession no. [CP014784](#)).  
240 (B) Genetic context of the partial integron gene cassette containing the other  
241 *bla*<sub>IMP-1</sub> gene in *P. alcaligenes* KAM426 and its surrounding genomic region (the  
242 region between 2,181,279 and 2,188,592 nt in accession no. [AP024354](#)), and  
243 structural comparison with the corresponding genomic regions in *P. alcaligenes*  
244 NEB 585 (the region between 2,758,939 and 2,768,635 nt in accession no.  
245 [CP014784](#)) and in *P. alcaligenes* ATCC 55044 (super-integron In55044 in  
246 accession no. [AY038186](#)). The strain names of *P. alcaligenes*, along with the  
247 country and year in which bacteria were isolated, are shown. *bla*<sub>IMP-1</sub> genes  
248 (CRG), other AMR genes (ARG), mobile gene elements (MGE), other genes  
249 (Others), and *P. alcaligenes* repetitive DNA (PAR) are highlighted in red, yellow,  
250 light blue, gray, and khaki green, respectively. Sequence identity is shown as a  
251 color scale with the indicated percentages. Linear comparisons of sequences  
252 were performed using BLASTn and visualized with Easyfig  
253 (<http://mjsull.github.io/Easyfig/>).

254

255 Fig. S1. Core genome phylogeny constructed by Roary v3.13.0  
256 (<https://github.com/sanger-pathogens/Roary>) with minimum percentage identity  
257 for BLASTp=70% and RAxML v8.2.4  
258 (<https://github.com/stamatak/standard-RAxML>), with 1,000 bootstraps using  
259 ceftriaxone-resistant *Pseudomonas alcaligenes* isolates in this study and  
260 reference strains of *P. alcaligenes* and *P. aeruginosa* (NCTC 10367<sup>T</sup> and NEB  
261 585 for *P. alcaligenes*, and PAO1 for *P. aeruginosa*). *P. aeruginosa* was used as

262 the outgroup. Bar lengths represent the number of substitutions per site in the  
263 core genome. AMR genes shown in color were detected by ResFinder v4.1  
264 (<https://cge.cbs.dtu.dk/services/ResFinder>) with the customized AMR gene  
265 database, including known *tmexCD-toprJ* genes. Genome assembly status  
266 (complete or draft genome sequence, contig numbers if draft), sizes, and  
267 accession numbers are shown.

268

269 Fig. S2. Circular representation of the chromosome of *Pseudomonas*  
270 *alcaligenes* KAM426 (accession no. [AP024354](https://ncbi.nlm.nih.gov/nucl/AP024354)) harboring *tmexC3D2-toprJ3*,  
271 along with two copies of *bla*<sub>IMP-1</sub> (shown in Figs. 1, 2A, and 2B), isolated in Japan  
272 in 2020. This was visualized with the CGView server (<http://cgview.ca>). Gray,  
273 green, purple, black, red, yellow, cyan, light green, and orange indicate coding  
274 sequences (CDS), GC skew+, GC skew-, GC content, tigecycline or  
275 carbapenem resistance genes (TRG/CRG), other AMR genes (ARG), mobile  
276 gene elements (MGE), type IV secretion system (T4SS)-associated genes, and  
277 type VI secretion system (T6SS)-associated genes, respectively. T4SS- and  
278 T6SS-associated genes were detected by TXSScan v1.0.5  
279 ([https://research.pasteur.fr/en/tool/txsscan-models-and-profiles-for-protein-secre](https://research.pasteur.fr/en/tool/txsscan-models-and-profiles-for-protein-secretion-systems/)  
280 [tion-systems/](https://research.pasteur.fr/en/tool/txsscan-models-and-profiles-for-protein-secretion-systems/)).

281

282 Fig. S3. Alignment of *Pseudomonas alcaligenes* repetitive DNAs (PARs) in *P.*  
283 *alcaligenes* strains. One PAR in *P. alcaligenes* ATCC 55044 (super-integron  
284 In55044 in accession no. [AY038186](https://ncbi.nlm.nih.gov/nucl/AY038186)), two PARs in *P. alcaligenes* KAM426  
285 (accession no. [AP024354](https://ncbi.nlm.nih.gov/nucl/AP024354)), and 11 PARs in *P. alcaligenes* NEB 585 (accession

286 no. [CP014784](#)) are shown. The multiple alignment comparison was performed  
287 and visualized using MAFFT v7 (<https://mafft.cbrc.jp/alignment/software/>). The  
288 PAR signature sequence and variable region are shown. Open boxes and  
289 arrows represent consensus sequences of inverted repeats (1L, 2L, 2R, and 1R),  
290 as described previously (14).

291

292 **References**

- 293 1. Fang LX, Chen C, Cui CY, Li XP, Zhang Y, Liao XP, Sun J, Liu YH. Emerging  
294 High-Level Tigecycline Resistance: Novel Tetracycline Destructases Spread via  
295 the Mobile Tet(X). **Bioessays**. 2020 42(8):e2000014.
- 296 2. Gasparrini AJ, Markley JL, Kumar H, Wang B, Fang L, Irum S, Symister CT,  
297 Wallace M, Burnham CD, Andleeb S, Tolia NH, Wencewicz TA, Dantas G.  
298 Tetracycline-inactivating enzymes from environmental, human commensal, and  
299 pathogenic bacteria cause broad-spectrum tetracycline resistance. **Commun**  
300 **Biol**. 2020 3(1):241.
- 301 3. Cheng Y, Chen Y, Liu Y, Guo Y, Zhou Y, Xiao T, Zhang S, Xu H, Chen Y, Shan  
302 T, Xiao Y, Zhou K. Identification of novel tetracycline resistance gene *tet(X14)*  
303 and its co-occurrence with *tet(X2)* in a tigecycline-resistant and colistin-resistant  
304 *Empedobacter stercoris*. **Emerg Microbes Infect**. 2020 9(1):1843-1852.
- 305 4. Li R, Peng K, Xiao X, Wang Y, Wang Z. Characterization of novel  
306 IS*Aba1*-bounded *tet(X15)*-bearing composite transposon Tn6866 in  
307 *Acinetobacter variabilis*. **J Antimicrob Chemother**. 2021 in press.
- 308 5. Lv L, Wan M, Wang C, Gao X, Yang Q, Partridge SR, Wang Y, Zong Z, Doi Y,  
309 Shen J, Jia P, Song Q, Zhang Q, Yang J, Huang X, Wang M, Liu JH. Emergence  
310 of a Plasmid-Encoded Resistance-Nodulation-Division Efflux Pump Conferring  
311 Resistance to Multiple Drugs, Including Tigecycline, in *Klebsiella pneumoniae*.  
312 **mBio**. 2020 Mar 3;11(2):e02930-19.
- 313 6. Hirabayashi A, Ha VTT, Nguyen AV, Nguyen ST, Shibayama K, Suzuki M.  
314 Emergence of a plasmid-borne tigecycline resistance in *Klebsiella pneumoniae*  
315 in Vietnam. **J Med Microbiol**. 2021 70(3). doi: 10.1099/jmm.0.001320.



- 316 7. Wang CZ, Gao X, Yang QW, Lv LC, Wan M, Yang J, Cai ZP, Liu JH. A Novel  
317 Transferable Resistance-Nodulation-Division Pump Gene Cluster,  
318 *tmexCD2-toprJ2*, Confers Tigecycline Resistance in *Raoultella ornithinolytica*.  
319 **Antimicrob Agents Chemother.** 2021 65(4):e02229-20.
- 320 8. Wang Q, Peng K, Liu Y, Xiao X, Wang Z, Li R. Characterization of  
321 TMexCD3-TOprJ3, an RND-Type Efflux System Conferring Resistance to  
322 Tigecycline in *Proteus mirabilis*, and Its Associated Integrative Conjugative  
323 Element. **Antimicrob Agents Chemother.** 2021 65(7):e0271220.
- 324 9. Suzuki M, Suzuki S, Matsui M, Hiraki Y, Kawano F, Shibayama K. Genome  
325 Sequence of a Strain of the Human Pathogenic Bacterium *Pseudomonas*  
326 *alcaligenes* That Caused Bloodstream Infection. **Genome Announc.** 2013  
327 1(5):e00919-13.
- 328 10. Gaibani P, Viciani E, Bartoletti M, Lewis RE, Tonetti T, Lombardo D,  
329 Castagnetti A, Bovo F, Horna CS, Ranieri M, Viale P, Re MC, Ambretti S. The  
330 lower respiratory tract microbiome of critically ill patients with COVID-19. **Sci**  
331 **Rep.** 2021 11(1):10103.
- 332 11. Morgan RD, Luyten YA, Johnson SA, Clough EM, Clark TA, Roberts RJ.  
333 Novel m4C modification in type I restriction-modification systems. **Nucleic**  
334 **Acids Res.** 2016 44(19):9413-9425.
- 335 12. Jiang X, Yin Z, Yuan M, Cheng Q, Hu L, Xu Y, Yang W, Yang H, Zhao Y, Zhao  
336 X, Gao B, Dai E, Song Y, Zhou D. Plasmids of novel incompatibility group  
337 IncpRBL16 from *Pseudomonas* species. **J Antimicrob Chemother.** 2020  
338 75(8):2093-2100.

- 339 13. Gillings MR. Integrons: past, present, and future. **Microbiol Mol Biol Rev.**  
340 2014 78(2):257-77.
- 341 14. Vaisvila R, Morgan RD, Posfai J, Raleigh EA. Discovery and distribution of  
342 super-integrans among pseudomonads. **Mol Microbiol.** 2001 42(3):587-601.
- 343 15. Mazel D, Dychinco B, Webb VA, Davies J. A distinctive class of integron in  
344 the *Vibrio cholerae* genome. **Science.** 1998 280(5363):605-8.
- 345 16. Rowe-Magnus DA, Guerout AM, Ploncard P, Dychinco B, Davies J, Mazel D.  
346 The evolutionary history of chromosomal super-integrans provides an ancestry  
347 for multiresistant integrans. **Proc Natl Acad Sci U S A.** 2001 98(2):652-7.
- 348 17. Rowe-Magnus DA, Guerout AM, Mazel D. Bacterial resistance evolution by  
349 recruitment of super-integron gene cassettes. **Mol Microbiol.** 2002  
350 43(6):1657-69.

# Fig. 1

## A

*P. alcaligenes*

**KAM426**

(1,977,208 - 2,027,209 nt)  
Japan, 2020

*P. alcaligenes*

**NEB 585**

(2,990,265 - 2,915,762 nt)  
USA, 1989

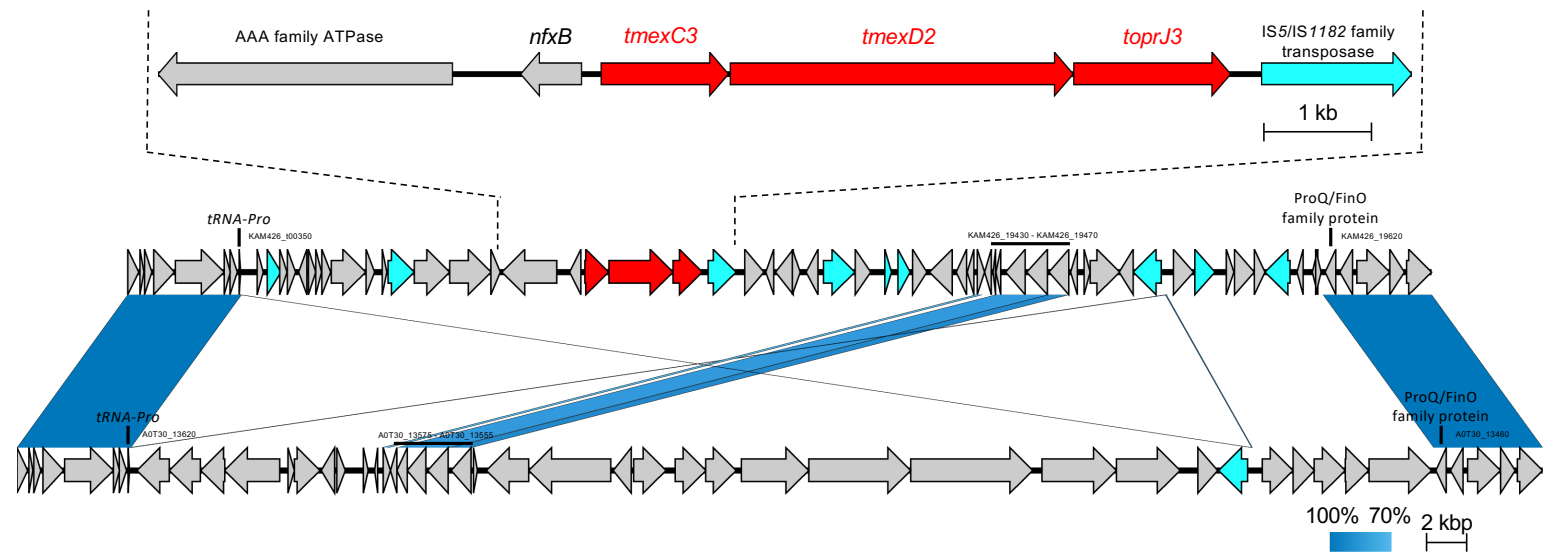

## B

*P. alcaligenes*

**KAM426**

(1,995,475 - 2,006,928 nt)  
Japan, 2020

*P. juntendi*

**BJP69**

(3,340,041 - 3,349,533 nt)  
China, 2015

*P. aeruginosa*

**pNDTH9845**

(225,014 - 215,640 nt)  
China, 2018

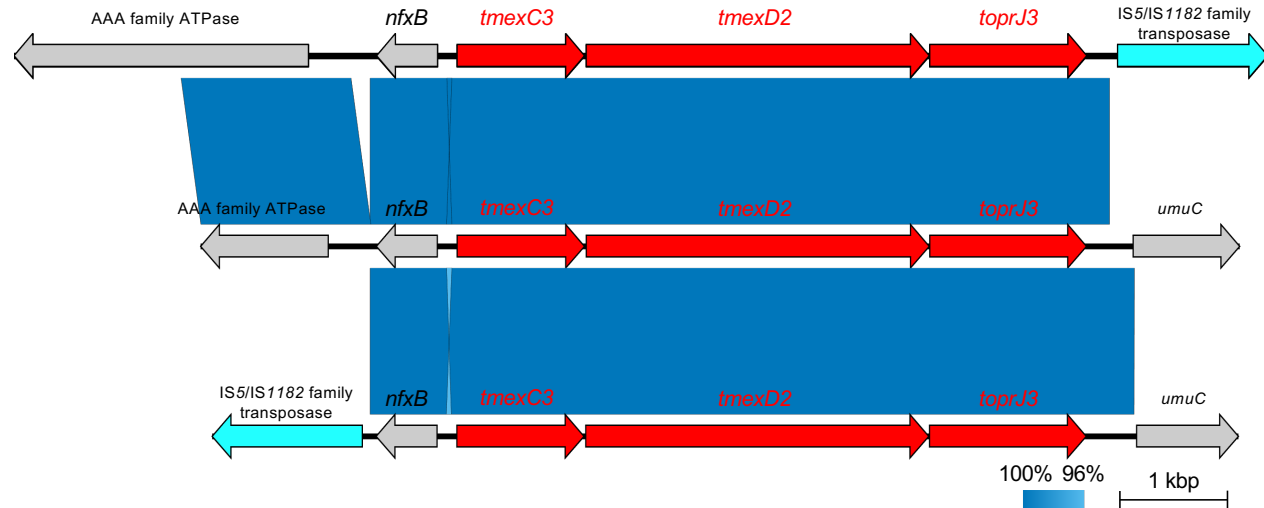

■ TRG ■ ARG ■ MGE ■ Other

# Fig. 2

## A

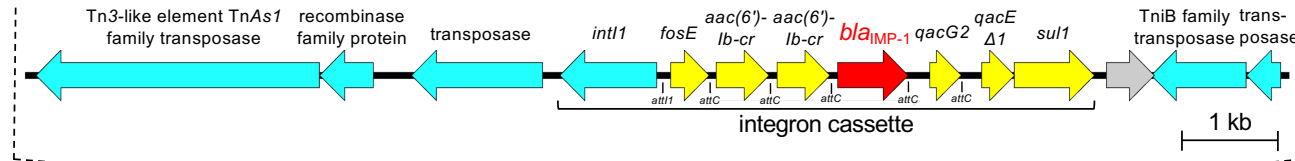

*P. alcaligenes*  
KAM426  
(3,757,827 - 4,033,855 nt)  
Japan, 2020

*P. alcaligenes*  
NEB 585  
(1,159,724 - 1,200,667 nt)  
USA, 1989

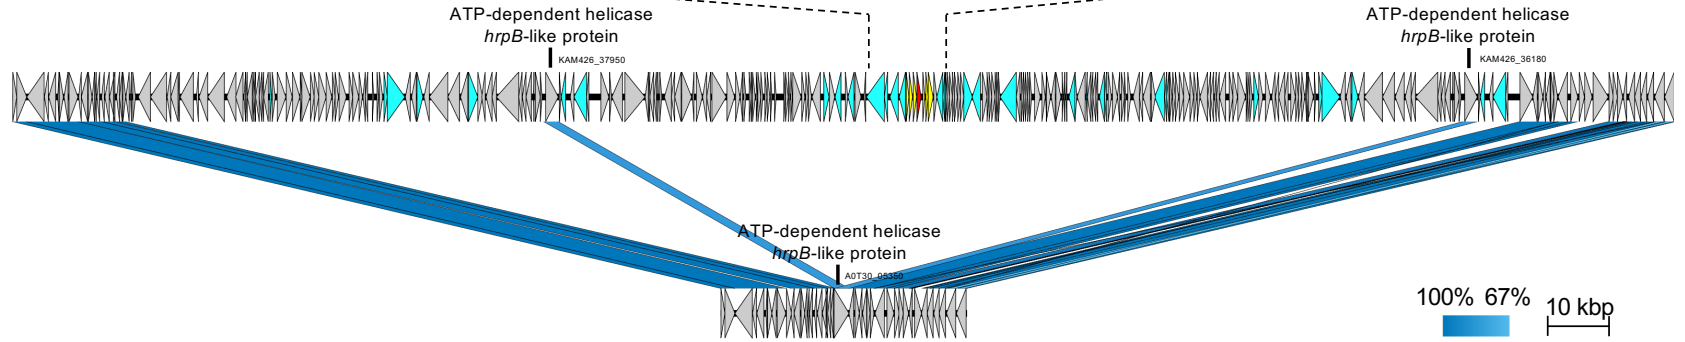

## B

*P. alcaligenes*  
KAM426  
(2,181,279 - 2,188,592 nt)  
Japan, 2020

*P. alcaligenes*  
NEB 585  
(2,758,939 - 2,768,635 nt)  
USA, 1989

*P. alcaligenes*  
ATCC 55044  
(super-integron In55044)  
USA

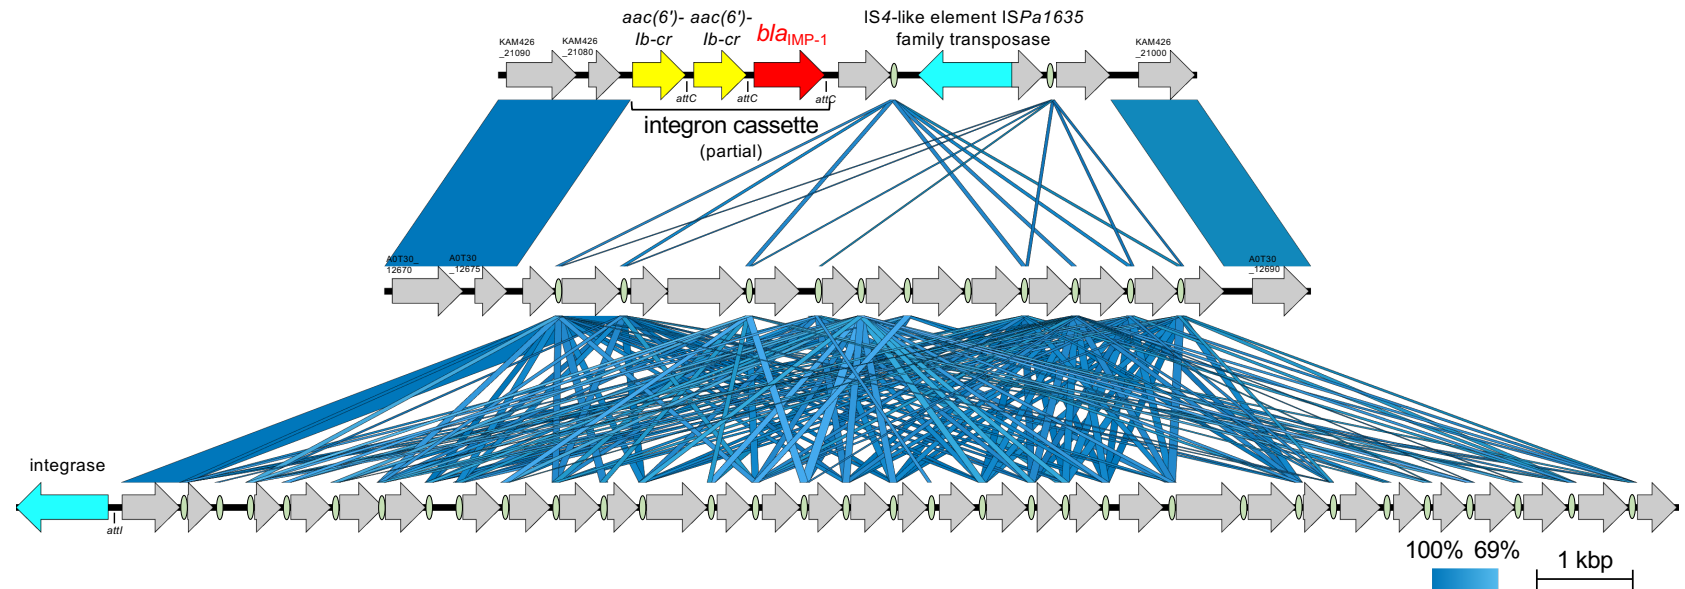

■ CRG   ■ ARG   ■ MGE   ■ Other   ● PAR
