1 **Title Page**

2 Emergence of a novel mobile RND-type efflux pump gene cluster,  
3 *tmexC3D2-toprJ1b*, in *Pseudomonas* species

4

5 Shotaro MAEHANA<sup>1,2,3</sup>, Ryotaro EDA<sup>2</sup>, Nagi NIIDA<sup>2</sup>, Aki HIRABAYASHI<sup>4</sup>, Kouji  
6 SAKAI<sup>5</sup>, Takashi FURUKAWA<sup>6</sup>, Kazunari SEI<sup>6</sup>, Hidero KITASATO<sup>1,2,3,#</sup>, and  
7 Masato SUZUKI<sup>4,\*,#</sup>

8

9 <sup>1</sup>Department of Microbiology, School of Allied Health Sciences, Kitasato  
10 University, Kanagawa, Japan

11 <sup>2</sup>Department of Environmental Microbiology, Graduate School of Medical  
12 Sciences, Kitasato University, Kanagawa, Japan

13 <sup>3</sup>Regenerative Medicine and Cell Design Research Facility, School of Allied  
14 Health Sciences, Kitasato University, Kanagawa, Japan

15 <sup>4</sup>Antimicrobial Resistance Research Center, National Institute of Infectious  
16 Diseases, Tokyo, Japan

17 <sup>5</sup>Department of Veterinary Science, National Institute of Infectious Diseases,  
18 Tokyo, Japan

19 <sup>6</sup>Department of Environmental Hygiene, School of Allied Health Sciences,  
20 Kitasato University, Kanagawa, Japan

21

22 \*Corresponding author: E-mail address: suzuki-m@nih.go.jp

23 #Equal contribution

24

25 Running title: A novel *tmexC3D2-toprJ1b* gene cluster in *Pseudomonas*

26

27 **Abstract**

28 Tigecycline exhibits promising activity against multidrug-resistant  
29 Gram-negative bacteria (MDR-GNB), whose infections are difficult to treat with  
30 antimicrobials. However, mobile tigecycline resistance genes, such as  
31 *tmexCD-toprJ*, have emerged in Enterobacterales isolated in China, Vietnam,  
32 and possibly other countries in the world. In this study, we investigated  
33 tigecycline-nonsusceptible GNB in Japan. Eight tigecycline- and  
34 carbapenem-nonsusceptible isolates of *Pseudomonas alcaligenes* were  
35 obtained from sewage water from a medical institution in Japan in 2020. Whole  
36 genome analysis of all *P. alcaligenes* isolates was performed using short-read  
37 sequencing, and the isolate KAM426 was further analyzed using long-read  
38 sequencing. For important antimicrobial resistance genes, analysis of  
39 surrounding structures and comparison with similar sequences in the public  
40 genome database were performed. We identified a novel hybrid type of  
41 *tmexCD-toprJ* gene cluster, *tmexC3D2-toprJ1b* consisting of *tmexC3*, *tmexC2*,  
42 and *toprJ1b*, in phylogenetically clonal isolates of *P. alcaligenes*. The complete  
43 genome sequence of KAM426 revealed that this isolate co-harbors  
44 *tmexC3D2-toprJ1b* and two copies of the carbapenemase gene *bla<sub>IMP-1</sub>* on the  
45 chromosome. *tmexC3D2-toprJ1b* in KAM426 was flanked by the IS5/IS1182  
46 family transposase gene, suggesting that the gene cluster was acquired by  
47 horizontal gene transfer (HGT). *tmexC3D2-toprJ1b* seemed to have spread to  
48 other *Pseudomonas* species such as *Pseudomonas aeruginosa* via HGT  
49 mediated by mobile gene elements such as a plasmid. This study identified  
50 *tmexCD-toprJ*-like tigecycline resistance genes in Japan for the first time and

51 suggests that diverse *tmexCD-toprJ*-like gene clusters, including  
52 *tmexC3D2-toprJ1b*, have spread among MDR-GNB worldwide. Further  
53 epidemiological genomic studies in clinical and environmental settings are  
54 needed.

55

## 56 Introduction

57 Tigecycline is considered a last-resort antimicrobial against infections caused  
58 by MDR Gram-negative bacteria. Recently, mobile tigecycline resistance genes,  
59 *tet(X3)*, *tet(X4)*, and other variants, *tet(X5)* to *tet(X15)*, encoding  
60 flavin-dependent monooxygenases that catalyze tigecycline degradation have  
61 emerged in Enterobacterales and *Acinetobacter* species in China and other  
62 countries.<sup>1-4</sup> Furthermore, mobile tigecycline resistance gene clusters,  
63 *tmexCD1-toprJ1*, *tmexCD2-toprJ2*, and *tmexCD3-toprJ1b* (also designated as  
64 *tmexCD3-toprJ3*), encoding the resistance–nodulation–cell division (RND) efflux  
65 pumps that excrete multiple antimicrobials, including tetracyclines such as  
66 tigecycline, cephalosporins, fluoroquinolones, and aminoglycosides, have  
67 emerged predominantly in Enterobacterales in China and Vietnam.<sup>5-11</sup> Mobile  
68 *tmexCD-toprJ* genes are estimated to originate from chromosomal *mexCD-oprJ*  
69 genes in *Pseudomonas* species.<sup>5</sup> Interestingly, however, *tmexCD1-toprJ1* has  
70 also been shown to spread to *Pseudomonas putida* by a megaplasmid.<sup>7</sup>

71 Here, we report *Pseudomonas alcaligenes* isolates harboring a novel variant  
72 of *tmexCD-toprJ* along with two copies of a metallo- $\beta$ -lactamase (MBL) gene,  
73 *bla<sub>IMP-1</sub>*. *P. alcaligenes* is a Gram-negative aerobic rod belonging to the bacterial  
74 family Pseudomonadaceae, of which members are common inhabitants of soil  
75 and water and are rare opportunistic human pathogens.<sup>12</sup> *P. alcaligenes* has  
76 also been suggested to be a causative agent of secondary bacterial infection  
77 during COVID-19 pneumonia.<sup>13</sup> However, little is known about the clinical  
78 importance of *P. alcaligenes*, mainly because of the difficulties in identifying and  
79 distinguishing this bacterium from closely related *Pseudomonas* species such as

80 *P. aeruginosa*, *P. mendocina*, and *P. pseudoalcaligenes*, in clinical settings.

81

## 82 Results and discussion

83 Eight cephalosporin-resistant isolates of *P. alcaligenes* were obtained from  
84 medical wastewater in Japan in 2020. Whole-genome sequence analysis of *P.*  
85 *alcaligenes* isolates by Illumina HiSeq X and the core genome phylogeny based  
86 on their draft genome sequences showed that these isolates were  
87 phylogenetically very similar (Fig. S1). Moreover, all *P. alcaligenes* isolates  
88 harbored the same set of antimicrobial resistance (AMR) genes, including  
89 *tmexCD-toprJ*-like genes, *bla*<sub>IMP-1</sub> (MBL gene conferring carbapenem resistance),  
90 *aac(6')-Ib-cr* (aminoglycoside resistance gene), *fosE* (fosfomycin resistance  
91 gene), *qacG2* (multidrug resistance gene), and *sul1* (sulfonamide resistance  
92 gene), suggesting that these isolates were clonally disseminated (Fig. S1).

93 One of the *P. alcaligenes* isolates, KAM426, was further sequenced using  
94 ONT MinION, and hybrid sequence analysis using both Illumina and ONT reads  
95 resulted in the circular complete chromosome sequence (4.68 Mb, accession no.  
96 [AP024354](#)). Average nucleotide identity (ANI) analysis revealed that KAM426 is  
97 96.5% identical to *P. alcaligenes* strain NCTC 10367<sup>T</sup> (type strain, accession no.  
98 [UGUP00000000](#)), and the isolate harbored *tmexCD-toprJ*-like genes along with  
99 two copies of *bla*<sub>IMP-1</sub> on its chromosome (Fig. 1). Also, *P. alcaligenes* KAM426  
100 harbored a set of T4SS- and T6SS-associated genes, respectively, that would  
101 be potential virulence factors (Fig. 1). AST showed that *P. alcaligenes* KAM426  
102 was nonsusceptible to tigecycline and broad-spectrum  $\beta$ -lactams, including  
103 carbapenems. According to the broth dilution method, the minimal inhibitory  
104 concentration (MIC) of tigecycline against KAM426 was 2 mg/L and was  
105 decreased to 1 mg/L in the presence of the efflux pump inhibitor NMP. According

106 to the Etest, the MICs of imipenem and meropenem against KAM426 were 8 and  
107 >32 mg/L, respectively, and these were decreased to <1 and 0.19 mg/L,  
108 respectively, in the presence of the MBL inhibitor EDTA. These results  
109 suggested that *tmexCD-toprJ*-like genes and *bla<sub>IMP-1</sub>* would be responsible for  
110 tigecycline and carbapenem resistance in this isolate. In *P. aeruginosa*,  
111 chromosomal efflux pump genes such as *mexCD-oprJ* (putative ancestor genes  
112 of *tmexCD-toprJ*) are known to contribute to tigecycline resistance.<sup>5</sup> Though *P.*  
113 *alcaligenes* KAM426 did not harbor *mexCD-oprJ*-like genes on the chromosome,  
114 other chromosomal efflux pump genes could contribute tigecycline resistance in  
115 addition to *tmexCD-toprJ*-like genes.

116 The coding sequence of the *tmexCD-toprJ*-like gene cluster in *P. alcaligenes*  
117 KAM426 (1,999,524 to 2,005,275 nt in accession no. [AP024354](#)) was highly  
118 identical to that of *tmexCD1-toprJ1* in *Klebsiella pneumoniae* strain AH581  
119 [96.8% (5,569/5,753 nt), 70,998 to 76,749 nt in accession no. [MK347425](#)]  
120 isolated from livestock in China in 2017,<sup>5</sup> that of *tmexCD2-toprJ2* in *Raoultella*  
121 *ornithinolytica* strain NC189 [98.4% (5,660/5,752 nt), 182,964 to 188,715 nt in  
122 accession no. [MN175502](#)] isolated from a human in China in 2018,<sup>8</sup> and that of  
123 *tmexCD3-toprJ1b* in *Proteus terrae* subsp. *cibarius* strain SDQ8C180-2T [98.1%  
124 (5,644/5,753 nt), 3,321,781 to 3,327,532 nt in accession no. [CP073356](#)] isolated  
125 from a chicken in China in 2018,<sup>11</sup> respectively. The identities of the *tmexC*-like  
126 gene in KAM426 (KAM426\_19240) compared with *tmexC1*, *tmexC2*, and  
127 *tmexC3* were 94.0% (1,094/1,164 nt), 94.6% (1,101/1,164 nt), and 98.5%  
128 (1,147/1,164 nt, the gene product was 98.4% identical to TMexC3 with six amino  
129 acid substitutions), respectively. For the *tmexD*-like gene in KAM426



130 (KAM426\_19250), these identities were 96.5% (3,025/3,136 nt), 99.1%  
131 (3,108/3,135 nt, the gene product was perfect match to TMexD2), and 97.1%  
132 (3,046/3,136 nt), respectively. For the *toprJ*-like gene in KAM426  
133 (KAM426\_19260), the identities were 99.9% (1,433/1,434 nt), 99.9%  
134 (1,417/1,419 nt), and 100% (1,434/1,434 nt, the gene product was perfect match  
135 to TOprJ1b), respectively. Thus, we designated *tmexCD-toprJ*-like genes in  
136 KAM426 as *tmexC3D2-toprJ1b*.

137 The *tnfxB*-like gene, which has been suggested to be involved in the  
138 expression of the *tmexCD-toprJ*-like gene,<sup>5</sup> was found upstream  
139 *tmexC3D2-toprJ1b* in *P. alcaligenes* KAM426 (KAM426\_19230 in accession no.  
140 [AP024354](#)). The identities of the *tnfxB*-like gene in KAM426 compared with  
141 *tnfxB1*, *tnfxB2*, and *tnfxB3* (accession nos. [MK347425](#), [CP054471](#), and  
142 [CP073356](#)) were 97.7% (545/558 nt), 97.8% (540/552 nt), and 99.8% (557/558  
143 nt, the gene product was 99.5% identical to TNfxB3 with one amino acid  
144 substitution), respectively. Thus, we designated the *tnfxB*-like gene in KAM426  
145 as *tnfxB3*. *tnfxB3-tmexC3D2-toprJ1b* was flanked by the IS5/IS1182 family  
146 transposase gene (Fig. 2A upper). Furthermore, the genomic region containing  
147 *tnfxB3-tmexC3D2-toprJ1b* in KAM426 was surrounded by many putative mobile  
148 gene elements (MGEs), and this genomic region was not present in *P.*  
149 *alcaligenes* strain NEB 585 (accession no. [CP014784](#)) (Fig. 2A). NEB 585 was  
150 isolated from a water environment in the United States in 1989 and is the only  
151 other *P. alcaligenes* strain for which the complete chromosome sequence has  
152 been reported<sup>14</sup> other than KAM426. The genomic recombination regions in  
153 KAM426 and NEB 585 encoded a set of common genes (KAM426\_19430 to

154 KAM426\_19470 in accession no. [AP024354](#), and A0T30\_13575 to  
155 A0T30\_13555 in accession no. [CP014784](#)) (Fig. 2A), although their functions  
156 are unknown. The results suggest that KAM426 acquired *tmexCD-toprJ*-like  
157 genes, which confer resistance to multiple antimicrobials including tigecycline,  
158 via horizontal gene transfer (HGT) mediated by MGEs.

159 BLASTn analysis using megablast revealed that two *Pseudomonas* species  
160 strains in the NCBI database of Nucleotide collection (nr/nt) have the exact same  
161 sequence containing the *tmexC3D2-toprJ1b* gene cluster along with *nfxB*. A  
162 *bla*<sub>DIM-2</sub>-harboring *Pseudomonas* species strain, BJP69, isolated from a human  
163 in China in 2015<sup>15</sup> carries *tmexC3D2-toprJ1b* on its chromosome (accession no.  
164 [CP041933](#)) and a *bla*<sub>KPC-2</sub>-harboring *P. aeruginosa* strain, NDTH9845, isolated  
165 from a human in China in 2018 carries *tmexC3D2-toprJ1b* on its IncP-2  
166 megaplasmid, pNDTH9845 (accession no. [CP073081](#)) (Fig. 2B). ANI analysis  
167 confirmed that BJP69 is 98.0% identical to *Pseudomonas juntendi* strain BML3<sup>T</sup>  
168 (type strain, accession no. [BLJG01000000](#)) and that NDTH9845 is 99.2%  
169 identical to *P. aeruginosa* DSM 50071<sup>T</sup> (type strain, accession no.  
170 [FUXR01000000](#)). *tmexC3D2-toprJ1b* was determined to be flanked by the  
171 IS5/IS1182 family transposase gene in *P. aeruginosa* pNDTH9845, whereas no  
172 MGE was found upstream or downstream of *tmexC3D2-toprJ1b* in *P. juntendi*  
173 BJP69 (Fig. 2B). Together with *P. alcaligenes* KAM426 in this study, these three  
174 *Pseudomonas* species strains harbor acquired carbapenemase genes, in  
175 addition to *tmexC3D2-toprJ1b*, showing that they have accumulated clinically  
176 relevant AMR genes. Of note, *P. juntendi* BJP69 carried one more copy of  
177 *tmexCD-toprJ*-like genes, *tmexC2D2-toprJ2*, on its IncP-2 megaplasmid,

178 pBJP69-DIM (accession no. [MN208064](#)).

179 The integron-integrase *IntI1* catalyzes site-specific recombination between the  
180 *attI1* and *attC* sites.<sup>16</sup> The class 1 integron gene cassette consisting of *intI1* with  
181 the *attI1* site, *qacEΔ1* (disrupted form of *qacE*), and *sul1* in *P. alcaligenes*  
182 KAM426 (accession no. [AP024354](#)) contain several AMR genes, including *fosE*,  
183 two copies of *aac(6′)-Ib-cr*, *bla<sub>IMP-1</sub>*, and *qacG2* with their *attC* sites (Fig. 3A). The  
184 *bla<sub>IMP-1</sub>*-containing integron gene cassette in KAM426 was found to be  
185 surrounded by many putative transposase genes, and this MGE-containing  
186 genomic region was not present in *P. alcaligenes* NEB 585 (accession no.  
187 [CP014784](#)) (Fig. 3A). The genomic region around ATP-dependent helicase  
188 genes (KAM426\_37950 and KAM426\_36180 in accession no. [AP024354](#), and  
189 A0T30\_05350 in accession no. [CP014784](#)) could be a hot spot for HGT (Fig. 3A),  
190 but there have been no reports to suggest this possibility to date.

191 The other copy of *bla<sub>IMP-1</sub>* was contained within a partial structure of the  
192 integron gene cassette consisting of two copies of *aac(6′)-Ib-cr* followed by  
193 *bla<sub>IMP-1</sub>*, as described previously herein (Fig. 3A), in a different location in the  
194 chromosome of *P. alcaligenes* KAM426 (Fig. 3B). Interestingly, a comparison  
195 between the *bla<sub>IMP-1</sub>*-containing genomic region of *P. alcaligenes* KAM426 and  
196 the corresponding genomic region in *P. alcaligenes* NEB 585 revealed the  
197 presence of multiple copies of short repeated sequences (approximately 80 bp),  
198 which were identical to PARs (*Pseudomonas alcaligenes* repetitive DNAs) within  
199 the super-integron In55044 in *P. alcaligenes* strain ATCC 55044 (accession no.  
200 [AY038186](#))<sup>17</sup> (Fig. 3B).

201 The super-integron, which was first identified in *Vibrio cholerae*, is

202 distinguished from conventional integrons in several respects, such as size and  
203 the nature of the genes contained within cassettes and contributes to the  
204 acquisition of AMR genes.<sup>18-20</sup> The PARs were reported as recombination sites  
205 for the integrase gene (*intI<sub>Pac</sub>* in accession no. [AY038186](#)) in the super-integron  
206 in *P. alcaligenes*.<sup>17</sup> The PARs in *P. alcaligenes* KAM426 and *P. alcaligenes* NEB  
207 585 contained conserved sequences of inverted repeats (1L, 2L, 2R, and 1R)  
208 with a PAR signature and variable regions between inverted repeats 2L and 2R,  
209 as shown in *P. alcaligenes* ATCC 55044<sup>17</sup> (Fig. S2). Although KAM426 and NEB  
210 585 lacked the integrase gene flanking the PAR and most of the contained  
211 genes had no known function, these plastic genomic regions in both strains  
212 retained their evolutionary histories of gene acquisitions mediated by the  
213 super-integron. There was no PAR around *bla<sub>IMP-1</sub>* in KAM426, suggesting that  
214 the super-integron is not directly involved in the acquisition of *bla<sub>IMP-1</sub>*, and this  
215 genomic region is likely one of the hot spots for HGT. KAM426 is thought to have  
216 incorporated *bla<sub>IMP-1</sub>* into the class 1 integron gene cassette first (Fig. 3A) and  
217 then incorporated the partial structure containing *bla<sub>IMP-1</sub>* into the other genomic  
218 region flanked by the super-integron (Fig. 3B), leading to a high level of  
219 resistance by increasing the copy number of AMR genes.

220 Our study provides a glimpse into environmental bacteria that have been  
221 rapidly and silently becoming resistant to clinically relevant antimicrobials,  
222 including tigecycline and carbapenem, and highlights the importance of AMR  
223 monitoring using wastewater to detect a future clinical crisis before it happens.  
224 Furthermore, *P. alcaligenes* would be considered an important environmental  
225 reservoir that supplies AMR genes to other related *Pseudomonas* species that

226 are more virulent and likely to cause nosocomial infections, such as *P.*

227 *aeruginosa*.

## 228 **Materials and methods**

### 229 **Bacterial isolation and antimicrobial susceptibility testing**

230 Eight cephalosporin-resistant isolates of *P. alcaligenes* (KAM426, KAM428,  
231 KAM429, KAM430, KAM432, KAM434, KAM435, and KAM436) were obtained  
232 from sewage water from a medical institution in Japan in February, 2020.  
233 Environmental water samples were collected and cultured using DHL  
234 (Deoxycholate Hydrogen sulfide Lactose) agar containing 2 mg/L of ceftriaxone.  
235 Bacterial species identification was performed using MALDI Biotyper (Bruker).  
236 antimicrobial susceptibility testing (AST) using *Escherichia coli* ATCC 25922 as  
237 quality control was performed according to the broth dilution method based on  
238 the CLSI 2020 guidelines or according to the Etest (bioMérieux) based on the  
239 manufacturer instructions. For tigecycline, AST was additionally performed in the  
240 presence or absence of 75 mg/L of the efflux pump inhibitor  
241 1-(1-naphthylmethyl)-piperazine (NMP) as used in the previous study.<sup>5</sup>

242

### 243 **Whole-genome sequencing and subsequent bioinformatics analysis**

244 Whole-genome sequencing of all eight cephalosporin-resistant isolates of *P.*  
245 *alcaligenes* was performed using HiSeq X (Illumina), and the isolate KAM426  
246 was further sequenced using MinION [Oxford Nanopore Technologies (ONT)]  
247 with the R9.4.1 flow cell. The library for Illumina sequencing (paired-end, insert  
248 size of 500-900 bp) was prepared using Nextera XT DNA Library Prep Kit and  
249 the library for ONT sequencing was prepared using Rapid Barcoding Kit  
250 (SQK-RBK004). Illumina reads were assembled de novo using Shovill v1.1.0  
251 (<https://github.com/tseemann/shovill>) with default parameters, resulting in the

252 draft genome sequences. For KAM426, ONT reads were basecalled using  
253 Guppy v4.2.2 with the high-accuracy mode, and then both Illumina and ONT  
254 reads were assembled de novo using Unicycler v0.4.8.0  
255 (<https://github.com/rwick/Unicycler>) with default parameters, resulting in the  
256 complete circular chromosome sequence (accession no.: [AP024354](#)).

257 Coding sequence (CDS) annotation and average nucleotide identity (ANI)  
258 analysis were performed using the DFAST server (<https://dfast.nig.ac.jp>).  
259 Antimicrobial resistance (AMR) genes were detected using ResFinder v4.1  
260 (<http://www.genomicepidemiology.org>) with default parameters using the  
261 customized AMR gene database including all known *tmexCD-toprJ* genes. Type  
262 IV secretion system (T4SS)- and type VI secretion system (T6SS)-associated  
263 genes were detected using TXSScan v1.0.5  
264 (<https://research.pasteur.fr/en/tool/txsscan-models-and-profiles-for-protein-secretion-systems/>). Circular genomic sequence was visualized using the CGView  
265 server (<http://cgview.ca>). Linear comparison of sequence alignment was  
266 performed using BLAST and visualized using Easyfig v.2.2.2  
267 (<http://mjsull.github.io/Easyfig/>).

269

270 **Nucleotide Sequences**

271 The complete genome sequence of *P. alcaligenes* KAM426 has been  
272 deposited at GenBank/EMBL/DDBJ under the accession number [AP024354](#).  
273 Draft genome sequences of *P. alcaligenes* KAM428, KAM429, KAM430,  
274 KAM432, KAM434, KAM435, and KAM436 have been deposited at  
275 GenBank/EMBL/DDBJ under the accession numbers [BPMN000000000](#),  
276 [BPMO000000000](#), [BPMP000000000](#), [BPMQ000000000](#), [BPMR000000000](#),  
277 [BPMS000000000](#), and [BPMT000000000](#), respectively.

278

279 **Acknowledgments**

280 This work was supported by grants (JP21fk0108093, JP21fk0108139,  
281 JP21fk0108133, JP21wm0325003, JP21wm0325022, JP21wm0225004,  
282 JP21wm0225008, and JP21gm1610003 to M. Suzuki) from the Japan Agency  
283 for Medical Research and Development (AMED), and grants (20K07509 to M.  
284 Suzuki; 21K15440 to A. Hirabayashi) from the Ministry of Education, Culture,  
285 Sports, Science and Technology (MEXT), Japan.

286



287 **References**

- 288 1. Fang LX, Chen C, Cui CY *et al.* Emerging High-Level Tigecycline Resistance:  
289 Novel Tetracycline Destructases Spread via the Mobile Tet(X). *Bioessays* 2020;  
290 **42**: e2000014.
- 291 2. Gasparrini AJ, Markley JL, Kumar H *et al.* Tetracycline-inactivating enzymes  
292 from environmental, human commensal, and pathogenic bacteria cause  
293 broad-spectrum tetracycline resistance. *Commun Biol* 2020; **3**: 241.
- 294 3. Cheng Y, Chen Y, Liu Y *et al.* Identification of novel tetracycline resistance  
295 gene *tet(X14)* and its co-occurrence with *tet(X2)* in a tigecycline-resistant and  
296 colistin-resistant *Empedobacter stercoris*. *Emerg Microbes Infect* 2020; **9**:  
297 1843-1852.
- 298 4. Li R, Peng K, Xiao X *et al.* Characterization of novel IS*Aba1*-bounded  
299 *tet(X15)*-bearing composite transposon Tn6866 in *Acinetobacter variabilis*. *J*  
300 *Antimicrob Chemother* 2021; **76**: 2481-2483.
- 301 5. Lv L, Wan M, Wang C *et al.* Emergence of a Plasmid-Encoded  
302 Resistance-Nodulation-Division Efflux Pump Conferring Resistance to Multiple  
303 Drugs, Including Tigecycline, in *Klebsiella pneumoniae*. *mBio* 2020; **11**:  
304 e02930-19.
- 305 6. Hirabayashi A, Ha VTT, Nguyen AV *et al.* Emergence of a plasmid-borne  
306 tigecycline resistance in *Klebsiella pneumoniae* in Vietnam. *J Med Microbiol*  
307 2021; **70** doi: 10.1099/jmm.0.001320.
- 308 7. Li R, Peng K, Xiao X *et al.* Emergence of a multidrug resistance efflux pump  
309 with carbapenem resistance gene *bla<sub>VIM-2</sub>* in a *Pseudomonas putida*

- 310 megaplasmid of migratory bird origin. *J Antimicrob Chemother* 2021; **76**:  
311 1455-1458.
- 312 8. Wang CZ, Gao X, Yang QW *et al.* A Novel Transferable  
313 Resistance-Nodulation-Division Pump Gene Cluster, *tmexCD2-toprJ2*, Confers  
314 Tigecycline Resistance in *Raoultella ornithinolytica*. *Antimicrob Agents*  
315 *Chemother* 2021; **65**: e02229-20.
- 316 9. Wang Q, Peng K, Liu Y *et al.* Characterization of TMexCD3-TOprJ3, an  
317 RND-Type Efflux System Conferring Resistance to Tigecycline in *Proteus*  
318 *mirabilis*, and Its Associated Integrative Conjugative Element. *Antimicrob Agents*  
319 *Chemother* 2021; **65**: e0271220.
- 320 10. Hirabayashi A, Dao TD, Takemura T *et al.* A transferable IncC-IncX3 hybrid  
321 plasmid co-carrying *bla*<sub>NDM-4</sub>, *tet(X)*, and *tmexCD3-toprJ3* confers resistance to  
322 carbapenem and tigecycline. *mSphere* 2021; **6**: e0059221.
- 323 11. Wang CZ, Gao X, Lv LC *et al.* Novel tigecycline resistance gene cluster  
324 *tnfxB3-tmexCD3-toprJ1b* in *Proteus* spp. and *Pseudomonas aeruginosa*,  
325 co-existing with *tet(X6)* on an SXT/R391 integrative and conjugative element. *J*  
326 *Antimicrob Chemother* 2021; dkab325.
- 327 12. Suzuki M, Suzuki S, Matsui M *et al.* Genome Sequence of a Strain of the  
328 Human Pathogenic Bacterium *Pseudomonas alcaligenes* That Caused  
329 Bloodstream Infection. *Genome Announc* 2013; **1**: e00919-13.
- 330 13. Gaibani P, Viciani E, Bartoletti M *et al.* The lower respiratory tract microbiome  
331 of critically ill patients with COVID-19. *Sci Rep* 2021; **11**: 10103.
- 332 14. Morgan RD, Luyten YA, Johnson SA *et al.* Novel m4C modification in type I  
333 restriction-modification systems. *Nucleic Acids Res* 2016; **44**: 9413-9425.

- 334 15. Jiang X, Yin Z, Yuan M *et al.* Plasmids of novel incompatibility group  
335 IncpRBL16 from *Pseudomonas* species. *J Antimicrob Chemother* 2020; **75**:  
336 2093-2100.
- 337 16. Gillings MR. Integrons: past, present, and future. *Microbiol Mol Biol Rev*  
338 2014; **78**: 257-77.
- 339 17. Vaisvila R, Morgan RD, Posfai J *et al.* Discovery and distribution of  
340 super-integrans among pseudomonads. *Mol Microbiol* 2001 **42**: 587-601.
- 341 18. Mazel D, Dychinco B, Webb VA *et al.* A distinctive class of integron in the  
342 *Vibrio cholerae* genome. *Science* 1998; **280**: 605-8.
- 343 19. Rowe-Magnus DA, Guerout AM, Ploncard P *et al.* The evolutionary history of  
344 chromosomal super-integrans provides an ancestry for multiresistant integrans.  
345 *Proc Natl Acad Sci U S A* 2001; **98**: 652-7.
- 346 20. Rowe-Magnus DA, Guerout AM, Mazel D. Bacterial resistance evolution by  
347 recruitment of super-integron gene cassettes. *Mol Microbiol* 2002; **43**: 1657-69.
- 348

## 349 **Legends**

350 Fig. 1. Circular representation of the chromosome of *Pseudomonas alcaligenes*  
351 KAM426 (accession no. [AP024354](#)) harboring *tmexC3D2-toprJ1b*, along with  
352 two copies of *bla*<sub>IMP-1</sub> (shown in Figs. 2 and 3), isolated in Japan in 2020. Gray,  
353 green, purple, black, red, yellow, cyan, light green, and orange indicate coding  
354 sequences (CDS), GC skew+, GC skew-, GC content, tigecycline or  
355 carbapenem resistance genes (TRG/CRG), other AMR genes (ARG), mobile  
356 gene elements (MGE), type IV secretion system (T4SS)-associated genes, and  
357 type VI secretion system (T6SS)-associated genes, respectively.

358

359 Fig. 2. The *tmexC3D2-toprJ1b* gene cluster in *Pseudomonas alcaligenes*  
360 KAM426. (A) Genetic context of the *tmexC3D2-toprJ1b* gene cluster in *P.*  
361 *alcaligenes* KAM426 and its surrounding genomic region (the region between  
362 1,977,208 and 2,027,209 nt in accession no. [AP024354](#)), and structural  
363 comparison with the corresponding genomic region in *P. alcaligenes* NEB 585  
364 (the region between 2,990,265 and 2,915,762 nt in accession no. [CP014784](#)).  
365 (B) Structural comparison of the *tmexC3D2-toprJ1b* gene cluster in *P.*  
366 *alcaligenes* KAM426 (the region between 1,995,475 and 2,006,928 nt in  
367 accession no. [AP024354](#)) with that in the chromosome of *P. juntendi* BJP69 (the  
368 region between 3,340,041 and 3,349,533 nt in accession no. [CP041933](#)) and in  
369 plasmid pNDTH9845 of *P. aeruginosa* NDTH9845 (the region between 225,014  
370 and 215,640 nt in accession no. [CP073081](#)). The strain names of *Pseudomonas*  
371 species, along with the country and year in which bacteria were isolated, are  
372 shown. *tmexC3D2-toprJ1b* genes (TRG), other AMR genes (ARG), mobile gene

373 elements (MGE), and other genes (Other) are highlighted in red, yellow, light  
374 blue, and gray, respectively. Sequence identity is shown as a color scale with the  
375 indicated percentages.

376

377 Fig. 3. Two copies of *bla*<sub>IMP-1</sub> genes in *Pseudomonas alcaligenes* KAM426. (A)  
378 Genetic context of the class I integron gene cassette containing *bla*<sub>IMP-1</sub> in *P.*  
379 *alcaligenes* KAM426 and its surrounding genomic region (the region between  
380 3,757,827 and 4,033,855 nt in accession no. [AP024354](#)), and structural  
381 comparison with the corresponding genomic region in *P. alcaligenes* NEB 585  
382 (the region between 1,159,724 and 1,200,667 nt in accession no. [CP014784](#)).  
383 (B) Genetic context of the partial integron gene cassette containing the other  
384 *bla*<sub>IMP-1</sub> gene in *P. alcaligenes* KAM426 and its surrounding genomic region (the  
385 region between 2,181,279 and 2,188,592 nt in accession no. [AP024354](#)), and  
386 structural comparison with the corresponding genomic regions in *P. alcaligenes*  
387 NEB 585 (the region between 2,758,939 and 2,768,635 nt in accession no.  
388 [CP014784](#)) and in *P. alcaligenes* ATCC 55044 (super-integron In55044 in  
389 accession no. [AY038186](#)). The strain names of *P. alcaligenes*, along with the  
390 country and year in which bacteria were isolated, are shown. *bla*<sub>IMP-1</sub> genes  
391 (CRG), other AMR genes (ARG), mobile gene elements (MGE), other genes  
392 (Others), and *P. alcaligenes* repetitive DNA (PAR) are highlighted in red, yellow,  
393 light blue, gray, and khaki green, respectively. Sequence identity is shown as a  
394 color scale with the indicated percentages.

395

396 Fig. S1. Core genome phylogeny constructed by Roary v3.13.0

397 (<https://github.com/sanger-pathogens/Roary>) with minimum percentage identity  
398 for BLASTp=70% and RAxML v8.2.4  
399 (<https://github.com/stamatak/standard-RAxML>), with 1,000 bootstraps using  
400 ceftriaxone-resistant *Pseudomonas alcaligenes* isolates in this study and  
401 reference strains of *P. alcaligenes* and *P. aeruginosa* (NCTC 10367<sup>T</sup> and NEB  
402 585 for *P. alcaligenes*, and PAO1 for *P. aeruginosa*). *P. aeruginosa* was used as  
403 the outgroup. Bar lengths represent the number of substitutions per site in the  
404 core genome. Detected AMR genes, genome assembly status (complete or draft  
405 genome sequence, contig numbers if draft), sizes, and accession numbers are  
406 shown.

407

408 Fig. S2. Alignment of *Pseudomonas alcaligenes* repetitive DNAs (PARs) in *P.*  
409 *alcaligenes* strains. One PAR in *P. alcaligenes* ATCC 55044 (super-integron  
410 In55044 in accession no. [AY038186](https://ncbi.nlm.nih.gov/nucl/AY038186)), two PARs in *P. alcaligenes* KAM426  
411 (accession no. [AP024354](https://ncbi.nlm.nih.gov/nucl/AP024354)), and 11 PARs in *P. alcaligenes* NEB 585 (accession  
412 no. [CP014784](https://ncbi.nlm.nih.gov/nucl/CP014784)) are shown. The multiple alignment comparison was performed  
413 and visualized using MAFFT v7 (<https://mafft.cbrc.jp/alignment/software/>). The  
414 PAR signature sequence and variable region are shown. Open boxes and  
415 arrows represent consensus sequences of inverted repeats (1L, 2L, 2R, and 1R),  
416 as described previously.<sup>17</sup>

Fig. 1

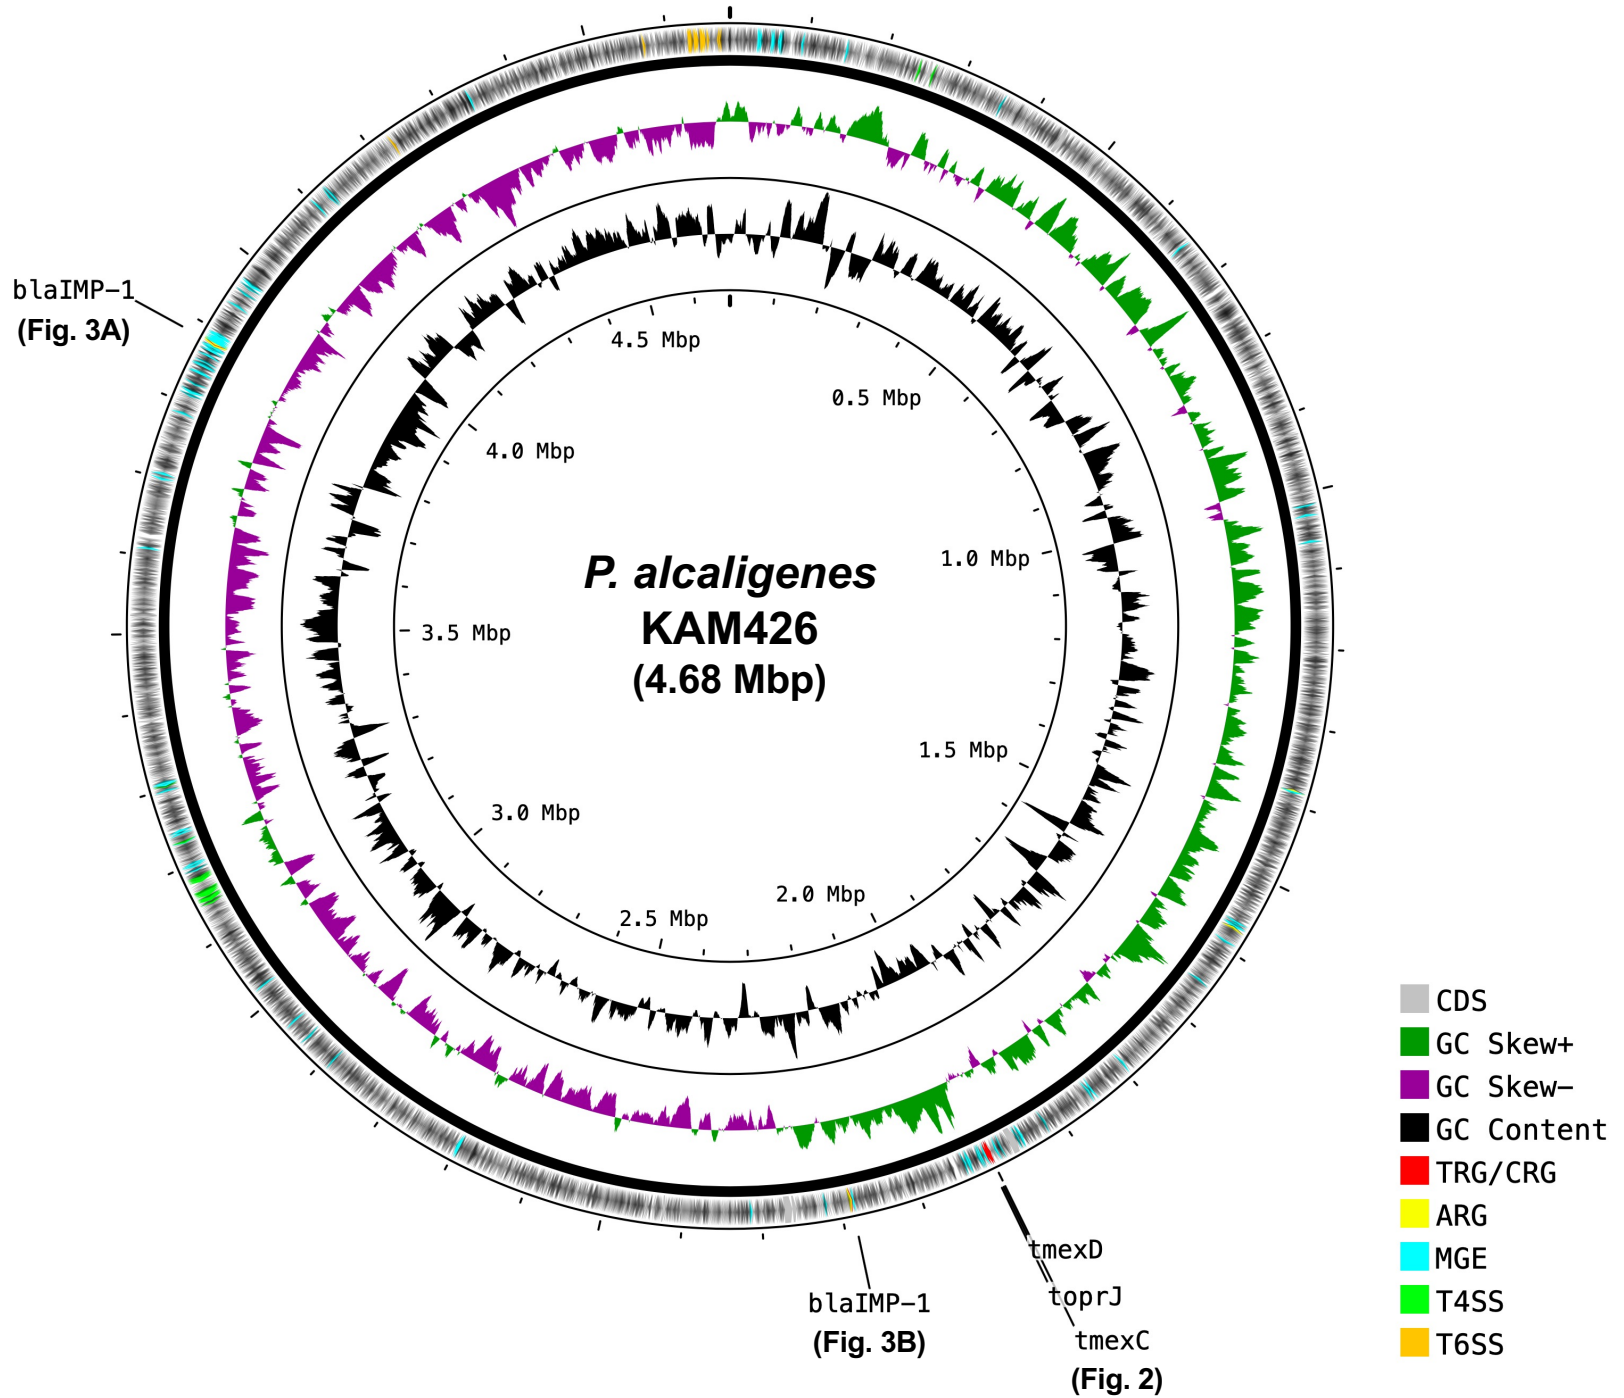

# Fig. 2

## A

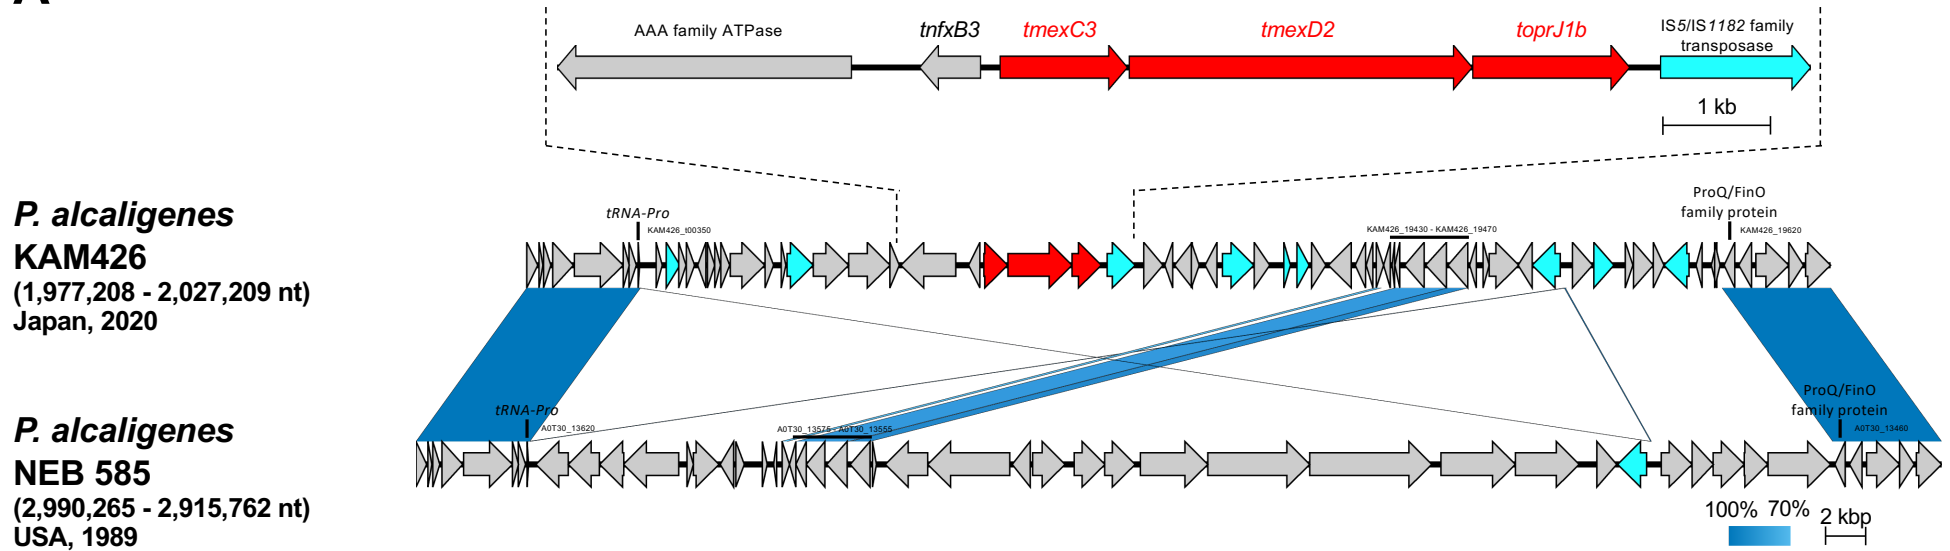

## B

***P. alcaligenes*  
KAM426**  
(1,995,475 - 2,006,928 nt)  
Japan, 2020

***P. juntendi*  
BJP69**  
(3,340,041 - 3,349,533 nt)  
China, 2015

***P. aeruginosa*  
pNDTH9845**  
(225,014 - 215,640 nt)  
China, 2018

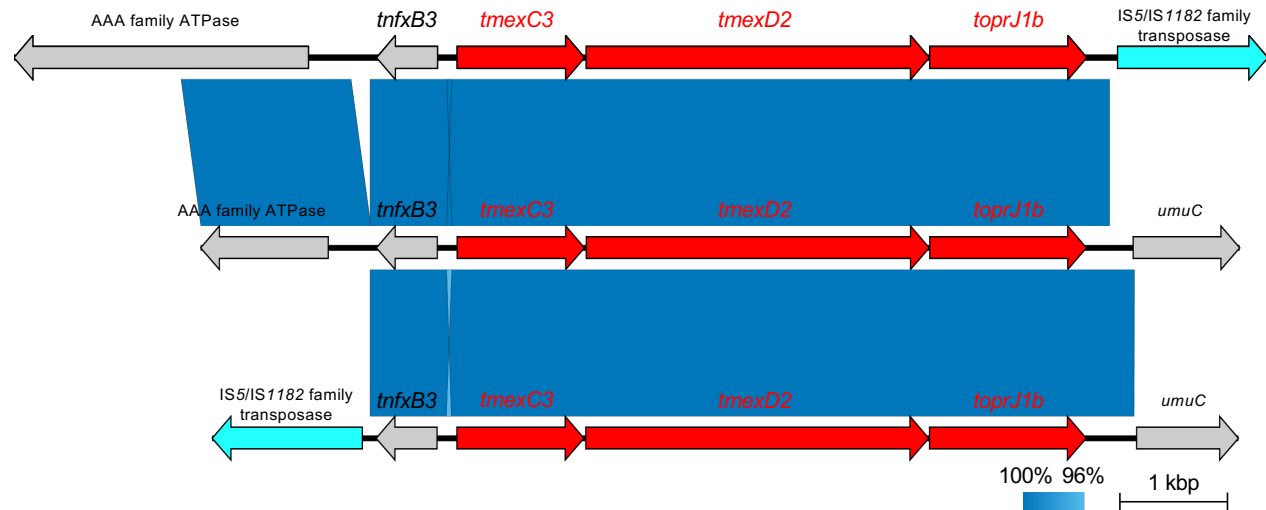

■ TRG ■ ARG ■ MGE ■ Other



# Fig. 3

## A

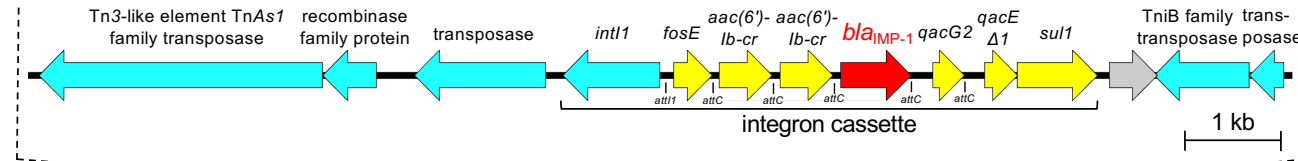

*P. alcaligenes*  
KAM426  
(3,757,827 - 4,033,855 nt)  
Japan, 2020

*P. alcaligenes*  
NEB 585  
(1,159,724 - 1,200,667 nt)  
USA, 1989

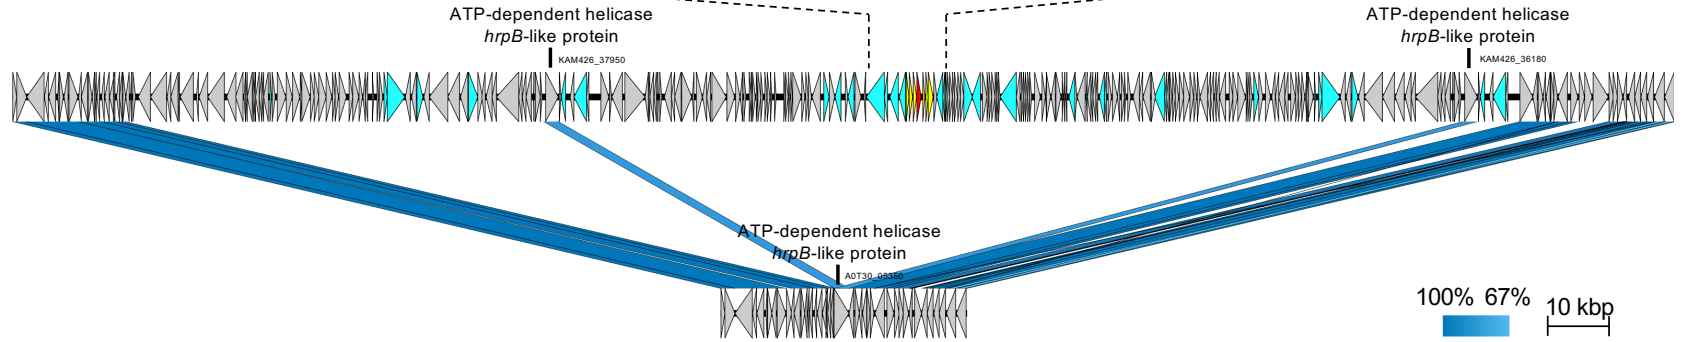

## B

*P. alcaligenes*  
KAM426  
(2,181,279 - 2,188,592 nt)  
Japan, 2020

*P. alcaligenes*  
NEB 585  
(2,758,939 - 2,768,635 nt)  
USA, 1989

*P. alcaligenes*  
ATCC 55044  
(super-integron In55044)  
USA

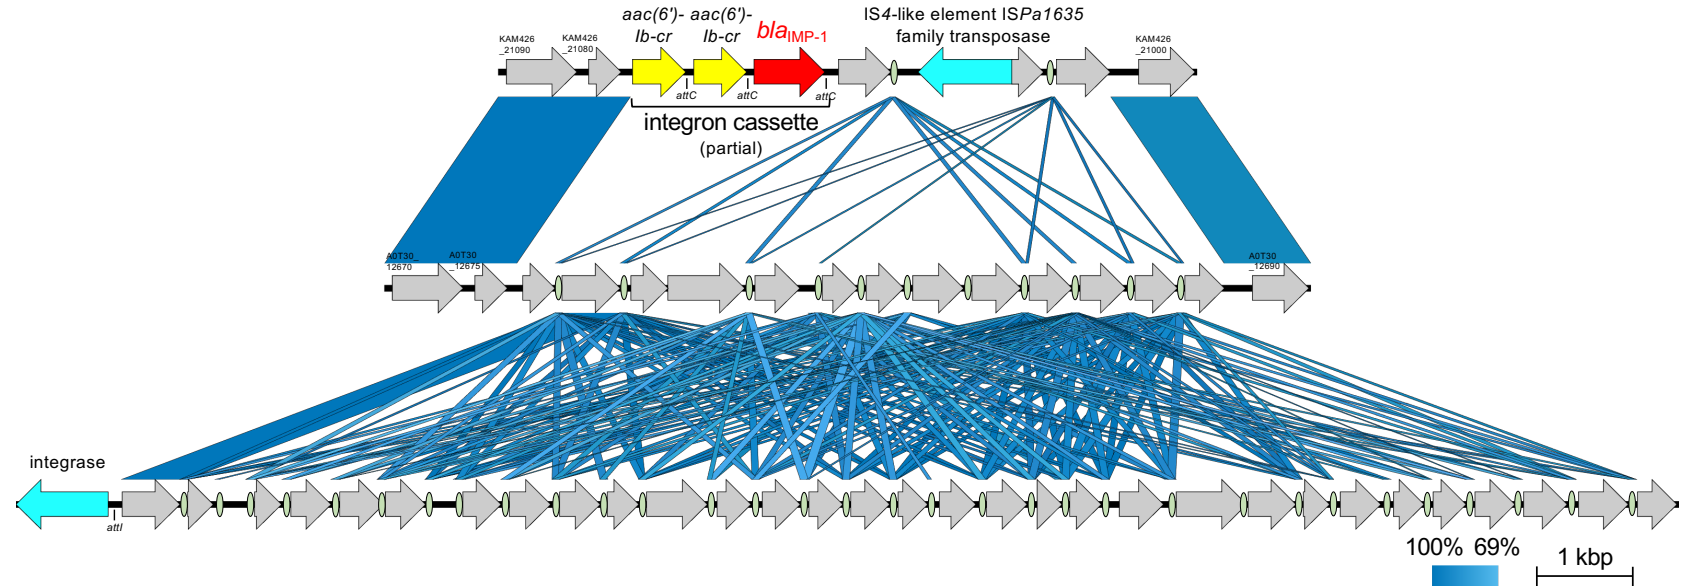

■ CRG   ■ ARG   ■ MGE   ■ Other   ● PAR
